# Supplementary material for: Erzhi pill for diabetic nephropathy: validation of integrated network pharmacology, molecular docking, proteomics, and transcriptomics
Source: Research Square preprint supplement (doi:10.21203/rs.3.rs-5308470/v1), 2024-11-26
Supplement: Supplementary file 1 [file 30a6bd10f593844155494c48.docx]

Supplementary Material

**1 Supplementary Tables and Figures**

- 1. **Supplementary Tables**

**Supplemental Table 1 Combined lot 1 (S1)**

| tablets | batch number | manufacturer | norm |
| --- | --- | --- | --- |
| Ligustri Lucidi Fructus | 21080081 | Chongqing Tian Jiang Fang Fang Pharmaceutical Co. | Each sachet contains 1 g, equivalent to 10 g of tablets. |
| Ecliptae | 21100818 | Chongqing Tian Jiang Fang Fang Pharmaceutical Co. | Each sachet contains 1 g, equivalent to 10 g of tablets. |

**Supplemental Table 2 Combined lot 2 (S2)**

| tablets | batch number | manufacturer | norm |
| --- | --- | --- | --- |
| Ligustri Lucidi Fructus | / | China Resources Sanjiu | / |
| Ecliptae | / | China Resources Sanjiu | / |

**Supplemental Table 3 Combined lot 3(S3)**

| tablets | batch number | manufacturer | norm |
| --- | --- | --- | --- |
| Ligustri Lucidi Fructus | 21080081 | Chongqing Tian Jiang Fang Fang Pharmaceutical Co. | Each sachet contains 1 g, equivalent to 10 g of tablets. |
| Ecliptae | 2110141101 | Jiangyin Tianjiang Pharmaceutical | 1.3 g per sachet, equivalent to 6 g in tablets. |

## Supplementary Figures


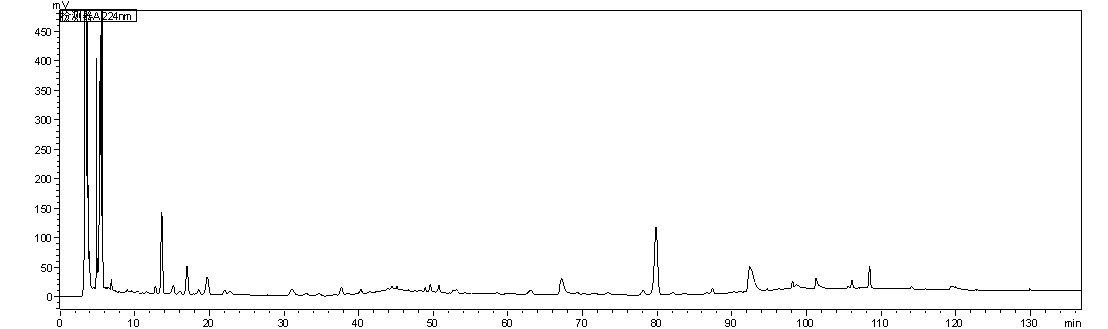
**
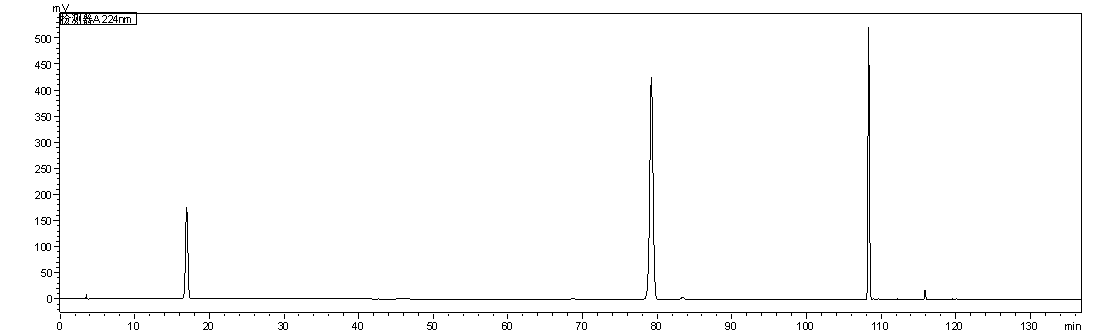
**

B

A

**Supplemental Figure 1.** Prescription fingerprint profile (A) and mixed control profile (B). peak 4: Rhodiola rosea glycoside, peak 10: Specnuezhenide, peak 12: wedelolactone.
